# Supplementary material for: Small and Abundant but Understudied Ribbed Sculpin Triglops pingelii (Cottidae, Teleostei) from the Kara Sea (Siberian Arctic): Distribution, Biology, and Comparison with Congeners
Source: MDPI journal article supplement (doi:10.3390/d14100853), 2022-10-09
Supplement: s1 [file s1]

**Table S1.** Chi-square tests obtained for frequencies of size, weight, and age classes of ribbed sculpin *Triglops pingelii* in the Kara Sea, September 2019. Values in bold font indicate statistical significance.

| Source                                | df | N  | $\chi^2$ | p                 |
|---------------------------------------|----|----|----------|-------------------|
| Sample                                |    |    |          |                   |
| TL, mm                                | 8  | 89 | 27,798   | <b>0,001</b>      |
| W, g                                  | 6  | 89 | 50,292   | <b>&lt; 0,001</b> |
| Age, years                            | 3  | 89 | 39,944   | <b>&lt; 0,001</b> |
| Pairwise males and females comparison |    |    |          |                   |
| TL, mm                                | 8  | 89 | 11,933   | 0,154             |
| W, g                                  | 6  | 89 | 12,467   | 0,052             |
| Age, years                            | 3  | 89 | 7,110    | 0,068             |

**Table S2.** Results of PERMANOVA test for diet composition among various size groups of ribbed sculpin *Triglops pingelii* in the Kara Sea, September 2019 (permutation N=999,  $\alpha=0.05$ , F= 4.078, p=0.001). Values in bold are statistically significant.

| F (pseudo-F) |              |              |              |
|--------------|--------------|--------------|--------------|
| Size class   | 41-70        | 71-100       | > 100        |
| 41-70        |              | 3.111        | 6.804        |
| 71-100       | 3.111        |              | 3.304        |
| > 100        | 6.804        | 3.304        |              |
| p            |              |              |              |
| Size class   | 41-70        | 71-100       | > 100        |
| 41-70        |              | <b>0.012</b> | <b>0.001</b> |
| 71-100       | <b>0.012</b> |              | <b>0.015</b> |
| > 100        | <b>0.001</b> | <b>0.015</b> |              |

**Table S3.** Results of ANOSIM test for diet composition among various size groups of ribbed sculpin *Triglops pingelii* in the Kara Sea, September 2019 (permutation N=999,  $\alpha=0.05$ , R = 0.088, p=0.012). Values in bold are statistically significant.

| R          |              |              |              |
|------------|--------------|--------------|--------------|
| Size class | 41-70        | 71-100       | > 100        |
| 41-70      |              | 0.007794     | 0.3077       |
| 71-100     | 0.007794     |              | 0.07793      |
| > 100      | 0.3077       | 0.07793      |              |
| p          |              |              |              |
| Size class | 41-70        | 71-100       | > 100        |
| 41-70      |              | 0.342        | <b>0.001</b> |
| 71-100     | 0.342        |              | <b>0.035</b> |
| > 100      | <b>0.001</b> | <b>0.035</b> |              |
